# Supplementary material
Source: PubMed Central journal article supplement (PMC3587204)
Supplement: 1214554110_pnas.201214554SI.pdf [file 1214554110_pnas.201214554SI.pdf]

# Supporting Information

Matarese et al. 10.1073/pnas.1214554110

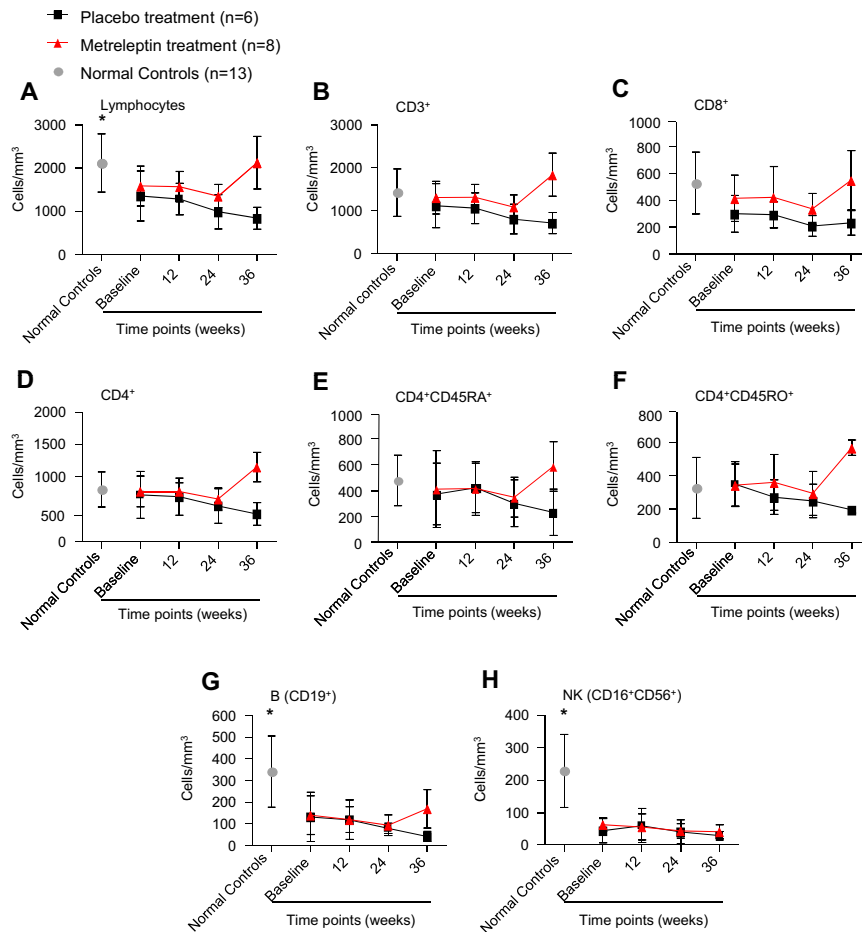

**Fig. S1.** Absolute number of lymphocytes, T cells, B cells, and natural killer (NK) cells in hypothalamic amenorrhea (HA) subjects over time compared with healthy controls. (A, G, and H) At baseline, the total populations of lymphocytes, B cells, and NK cells were significantly lower in HA subjects than in controls ( $*P < 0.05$ ). (B–F) CD3<sup>+</sup>, CD4<sup>+</sup>, CD8<sup>+</sup> T, CD4<sup>+</sup>CD45RA<sup>+</sup>, and CD4<sup>+</sup>CD45RO<sup>+</sup> cell populations were not different in HA subjects and normal controls at baseline.

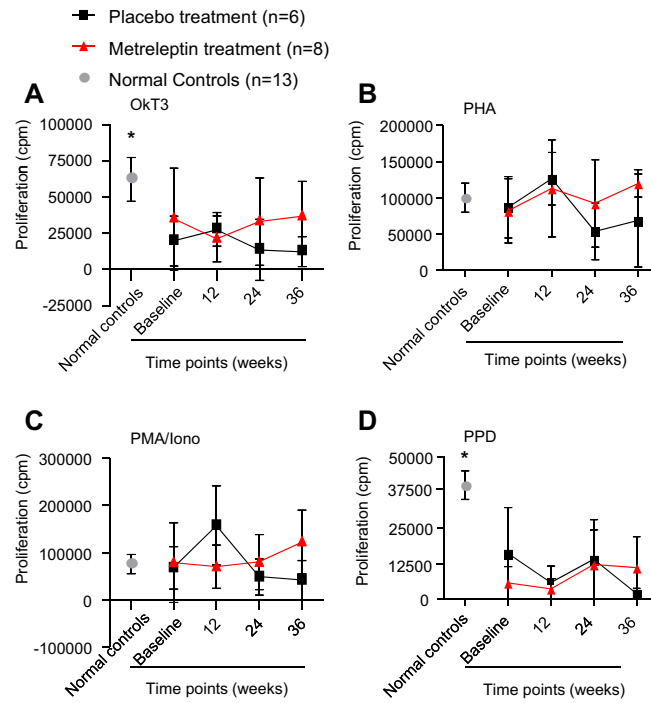

**Fig. S2.** Proliferative response of peripheral blood mononuclear cells (PBMCs) to OKT3 (A), phytohemagglutinin (PHA) (B), phorbol 12-myristate 13-acetate plus ionomycin (PMA/Iono) (C), and purified protein derivative (PPD) (D) in HA subjects over time compared with healthy controls. At baseline, the proliferative response to OKT3 (A) and PPD (D) stimulation was significantly lower ( $*P < 0.05$ ) in HA subjects than in healthy controls.

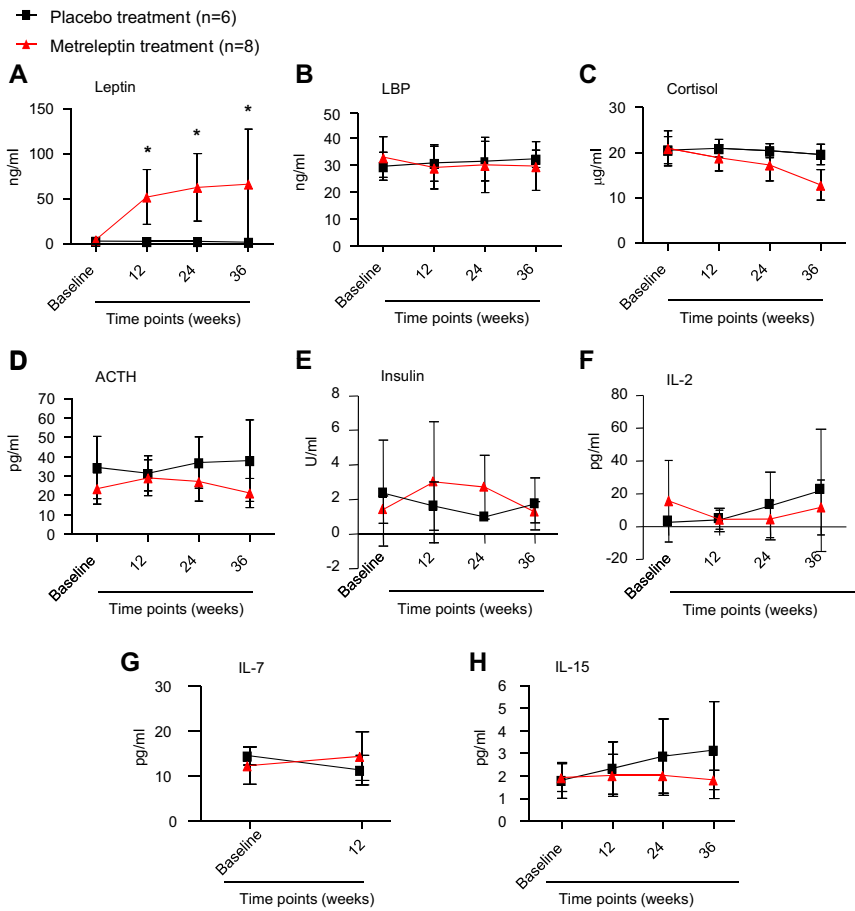

Fig. S3. Levels of hormones and cytokines in HA subjects over time. Only leptin levels (A) were significantly higher in the time course. There were no significant differences in the parameters analyzed in B–H.

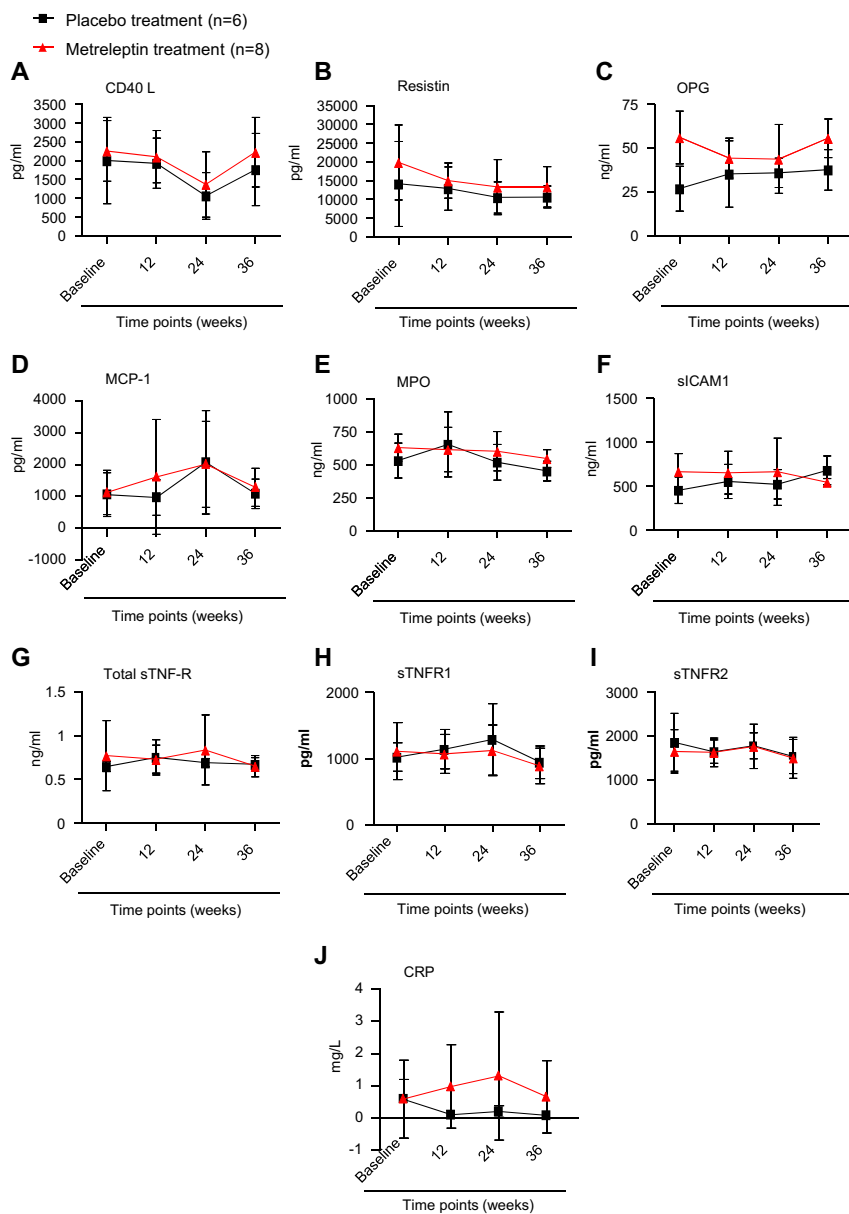

Fig. S4. Levels of inflammatory and metabolic parameters in HA subjects over time. There were no statistically significant differences in the metabolic/inflammatory parameters analyzed in A–J.

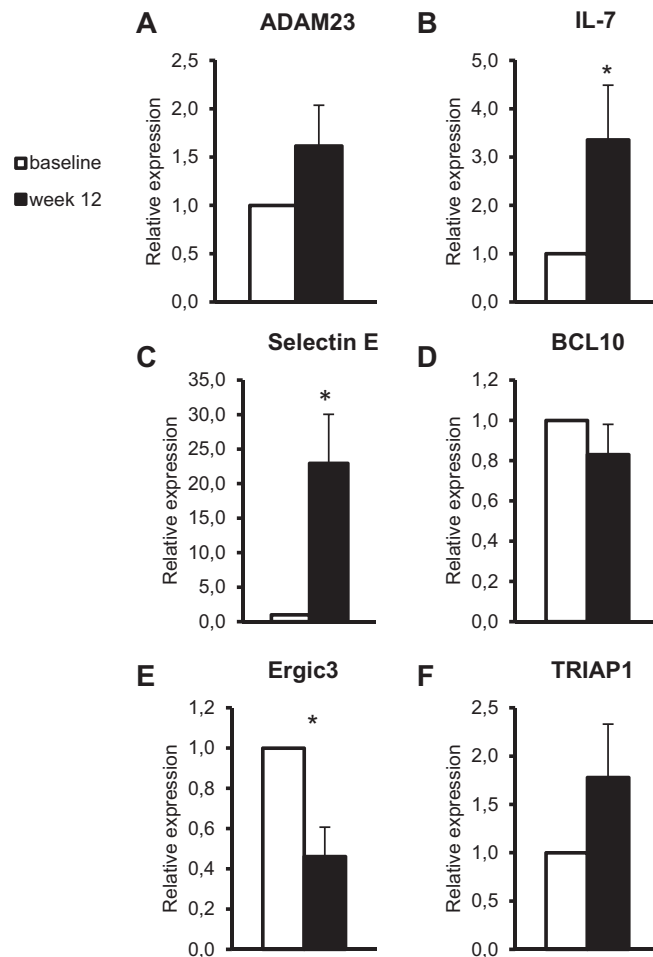

**Fig. S5.** Gene-expression levels were verified by real-time PCR. Metreleptin-treated groups at week 12 were compared with the baseline levels. Gene-expression levels of IL-7 (B), selectin E (C), and Ergic3 (E) were changed significantly ( $*P \leq 0.05$ ) compared with their baseline levels. Gene-expression levels of ADAM-23 (A), BCL-10 (D), and TRIAP-1 (F) did not change significantly from baseline.

**Table S1. Differences in gene-expression profile in response to metreleptin treatment at week 24 vs. baseline**

| Gene symbol     | Gene assignment                                               | Gene ID | P value    | Fold change |
|-----------------|---------------------------------------------------------------|---------|------------|-------------|
| <i>Cacng8</i>   | Calcium channel, voltage-dependent, gamma subunit 8           | 59283   | 0.00197222 | 0.74792967  |
| <i>ZNF490</i>   | Zinc finger protein 490                                       | 57474   | 0.00107306 | 0.59417048  |
| <i>CENPI</i>    | Centromere protein I                                          | 2491    | 0.00724578 | 0.45477823  |
| <i>LELP1</i>    | Late cornified envelope-like proline-rich 1                   | 149018  | 0.00013992 | 0.42264562  |
| <i>DPPA5</i>    | Developmental pluripotency associated 5                       | 340168  | 0.00743253 | 0.33456177  |
| <i>ARNT</i>     | Aryl hydrocarbon receptor nuclear translocator                | 405     | 0.00860958 | 0.31569146  |
| <i>WDR53</i>    | WD repeat domain 53                                           | 348793  | 0.00494466 | 0.29463523  |
| <i>SPHKAP</i>   | SPHK1 interactor, AKAP domain containing                      | 80309   | 0.00351039 | 0.2461562   |
| <i>DBT</i>      | Dihydroliipoamide branched chain transacylase E2              | 1629    | 0.0099502  | 0.23485338  |
| <i>BCL2L11</i>  | BCL2-like 11 (apoptosis facilitator)                          | 10018   | 0.00543426 | -0.3127599  |
| <i>PRDM2</i>    | PR domain containing 2, with ZNF domain                       | 7799    | 0.00790638 | -0.322973   |
| <i>Cnr2</i>     | Cannabinoid receptor 2 (macrophage)                           | 1269    | 0.00416617 | -0.3281563  |
| <i>TGFBRAP1</i> | Transforming growth factor beta receptor-associated protein 1 | 9392    | 0.00359646 | -0.3439002  |
| <i>ZNF592</i>   | Zinc finger protein 592                                       | 9640    | 0.00782736 | -0.3622582  |
| <i>MED10</i>    | Mediator complex subunit 10                                   | 84246   | 0.00406945 | -0.547997   |
| <i>STX10</i>    | Syntaxin 10                                                   | 8677    | 0.00218949 | -0.751147   |

**Table S2. Differences in gene-expression profile in response to metreleptin treatment at week 36 vs. baseline**

| Gene symbol      | Gene assignment                                                                               | Gene ID | P value    | Fold change |
|------------------|-----------------------------------------------------------------------------------------------|---------|------------|-------------|
| <i>TNFRSF10C</i> | Tumor necrosis factor receptor superfamily, member 10c, decoy without an intracellular domain | 8794    | 0.006717   | 0.90305714  |
| <i>ZNF200</i>    | Zinc finger protein 200                                                                       | 7752    | 0.00610212 | 0.54233656  |
| <i>f2r1</i>      | Coagulation factor II (thrombin) receptor-like 1                                              | 2150    | 0.00829106 | 0.51888316  |
| <i>GAST</i>      | Gastrin                                                                                       | 2520    | 0.00128913 | 0.46499107  |
| <i>GLI1</i>      | GLI family zinc finger 1                                                                      | 2735    | 0.00939256 | 0.45136181  |
| <i>CYTH4</i>     | Cytohesin 4                                                                                   | 27128   | 0.00437337 | 0.36625752  |
| <i>bbs7</i>      | Bardet-Biedl syndrome 7                                                                       | 55212   | 0.00857128 | 0.27351589  |
| <i>ilf2</i>      | Interleukin enhancer binding factor 2, 45kDa                                                  | 3608    | 0.00451506 | -0.692222   |
| <i>TXNIP</i>     | Thioredoxin interacting protein                                                               | 10628   | 0.00791743 | -0.4120624  |
| <i>Cdk5r1</i>    | Cyclin-dependent kinase 5, regulatory subunit 1 (p35)                                         | 8851    | 0.00957235 | -0.4554088  |
| <i>GFI1</i>      | Growth factor independent 1 transcription repressor                                           | 2672    | 0.0062539  | -0.5224277  |
| <i>ZBTB16</i>    | Zinc finger and BTB domain containing 16                                                      | 7704    | 0.00228704 | -0.7820146  |

**Table S3. Sequence of primers for RT-PCR microarray validation**

| Gene name     | Forward               | Reverse               |
|---------------|-----------------------|-----------------------|
| <i>18s</i>    | GTAACCCGTTGAACCCATT   | CCATCCAATCGGTAGTAGCG  |
| <i>ADAM23</i> | GCTACAATGGCGAGTGCAAG  | CTCCATCCTTCCCGCAGTTT  |
| <i>SELE</i>   | GTGAAGCTCCCACTGAGTCC  | AGCCAGAGGAGAAATGGTGC  |
| <i>IL7</i>    | TTTATTCCGTGCTGCTCGC   | CCAGGGCAGCTGGTTTTCTT  |
| <i>Ergic3</i> | GAAGTCAATAAGGTGGCCGGA | AGCTCTGCAAGTCATGGATCT |
| <i>TRIAP1</i> | CTGTCGCCATGAACAGTGTG  | AAATTTCTCGGCGAACCAAGC |
| <i>BCL10</i>  | TTCCAGATGGAGCCACGAAC  | CGTCGTGCTGGATTCTCTT   |

## Other Supporting Information Files

[Dataset S1 \(XLSX\)](#)

[Dataset S2 \(XLSX\)](#)

[Dataset S3 \(XLSX\)](#)
